# Supplementary material for: Safety and Efficacy of Dabigatran Etexilate vs Dose-Adjusted Warfarin in Patients With Cerebral Venous Thrombosis: A Randomized Clinical Trial
Source: PubMed Central journal article supplement — JAMA Neurol. 2019 Sep 3;76(12):1457–65. doi: 10.1001/jamaneurol.2019.2764 (PMC6724157; doi:10.1001/jamaneurol.2019.2764), 2019-09-03
Supplement: jamaneurol-76-1457-s003.pdf [file jamaneurol-76-1457-s003.pdf]

## Data Sharing Statement

Ferro. Safety and Efficacy of Dabigatran Etexilate vs Dose-Adjusted Warfarin in Patients With Cerebral Venous Thrombosis. *JAMA Neurol.* Published September 03, 2019. 10.1001/jamaneurol.2019.2764

### Data

**Data available:** Yes

**Data types:** Deidentified participant data

**How to access data:** <https://clinicalstudydatarequest.com>

**When available:** With publication

### Supporting Documents

**Document types:** None

### Additional Information

**Who can access the data:** Researchers whose proposed use of the data has been approved

**Types of analyses:** For a specified purpose

**Mechanisms of data availability:** With investigator support

**Any additional restrictions:** N/A
